# Supplementary material for: Registration of published randomized trials: a systematic review and meta-analysis
Source: BMC Med. 2018 Oct 16;16:173. doi: 10.1186/s12916-018-1168-6 (PMC6190546; doi:10.1186/s12916-018-1168-6)
Supplement: Supplementary file 1 — abstracted data. (CSV 2 kb) [file 12916_2018_1168_MOESM1_ESM.csv]

group	study	med.field	n.years	n.journals	n.trials	n.reg.trials	n.trials.reg.prosp	n.trials2	author
0	Acta Anesthes Scand 2015	anesthesiology	6	1	200	85	43	200	Ostervig 2015
0	Anesth Analg 2017	anesthesiology	4	6	860	304	119	860	Jones 2017
0	J Invest Dermatol 2012	atopic dermatitis	4.58	NA	109	37	NA		Nankervis 2012
0	JAMA 2009	cardiology, rheumatology, gastroenterology	1	22	323	234	NA		Mathieu 2009
0	Int J Cardiol 2017	cardio-thoracic surgery	8	4	287	73	30	287	Wiebe 2017
0	BMJ2017/JAMA Intern Med 2015	cardiovascular disease	0.08	NA	191	92	NA		Emdin 2015
0	J Consult Clin Psychol 2015	clinical psychology	1	25	101	41	13	101	Cybulski 2016
0	Int Care Med 2014	critical care	6.67	NA	90	59	20	90	Anand 2014
0	Acta Psych Scand 2015	depression	3	NA	170	92	51	170	Shinohara 2015
0	Ann Emerg Med 2012	emergency medicine	4	5	123	57	12	123	Jones 2012
0	J Clin Epidemiol 2017/Human Reproduction-2017	fertility medicine	5	NA	693	309	31	693	Farquhar 2017
0	Scand J GastroEnterol 2013	gastroenterology and hepatology	4	10	305	252	94	305	Li 2013
0	Age Ageing 2014	geriatrics	5	5	220	140	54	220	Mann 2014
0	Transplantation 2011	kidney transplantation	5	NA	307	74	NA		McGee 2011
0	Res Integr Peer Rev	nursing	4.92	3	135	57	24	135	Gray 2017
0	Obesity 2017	obesity	6.5	4	223	170	82	223	Byrne 2017
0	J Clin Oncol 2012/Bull Cancer 2012	oncology	5	10	366	215	NA		You 2012
0	J Dent Res 2015	oral health	1	15	317	73	13	317	Smail-Faugeron 2015
0	BMC Pediatrics 2010	pediatrics	1	NA	300	69	NA		Hamm 2010
0	J Pediatr 2017	pediatrics	1	NA	300	139	NA		Gates 2017
0	Trials 2016 (2)	pediatrics	0.4	1	20	20	18	20	Rosati 2016
0	Phys Ther 2013	physical therapy	1	NA	200	67	12	200	Pinto 2013
0	Int J Surgery 2017	plastic surgery	1	3	24	8	NA		Pidgeon 2017
0	PLOS One 2015	psychiatry	5	5	181	160	NA		Scott 2015
0	J Psychosom Res 2011	psychosomatic and behavioral medicine	1.75	4	63	13	NA		Milette 2011
0	J Psychosom Res 2015	psychosomatic and behavioral medicine	1.83	4	76	40	11	76	Riehm 2015
0	Acta Psych Scand 2017	psychotherapy	5	5	112	67	27	112	Bradley 2017
0	PLOS One 2016	shoulder arthroplasty	11	10	37	12	7	37	Sims 2016
0	Ann Surg 2014	surgery	2	10	246	160	NA		Killeen 2014
0	Trials 2013	surgery	0.5	10	103	85	15	103	Hardt 2013
0	BMJ Open 2011	urology	1	10	106	63	NA		Kunath 2011
2	Anaesthesia 2017	anesthesiology	3	1	90	70	21	90	El-Boghdadly 2017
2	Br J Anesth 2016	anesthesiology	1	12	183	113	53	183	Bonnot 2016
2	Res Synth Methods 2014	diabetes, osteoporosis, lip-modifying agents	6	NA	299	50	NA		Norris 2014
2	BMC Medicine 2016	multiple	9	NA	322	225	74	322	Dechartres 2016
2	J Clin Epidemiol 2012	multiple	1	NA	526	89	21	526	Reveiz 2012
2	J Clin Epidemiol 2015 (2)	multiple	9	NA	54	29	NA		Dekkers 2015
2	JRSM Open 2014	multiple	1	2	76	75	NA		Walker 2014
2	PLOS One 2012	multiple	0.08	121	302	185	NA		Van de Wetering 2012
2	J Clin Epidemiol 2011	multiple (non inferiority trials)	0.08	121	133	88	9	136	Dekkers 2011
